# Supplementary material for: Poly(ε-caprolactone) with pendant natural peptides: an old polymeric biomaterial with new properties
Source: Royal Society of Chemistry journal article supplement (doi:10.1039/c7py01012e), 2017-01-01
Supplement: c7py01012e1.pdf [file c7py01012e1.pdf]

## Supporting Information

### Poly( $\epsilon$ -caprolactone) with Pendant Natural Peptides: An Old Polymeric Biomaterial with New Properties

Yuanyuan Ju, Mingming Zhang, Hanying Zhao

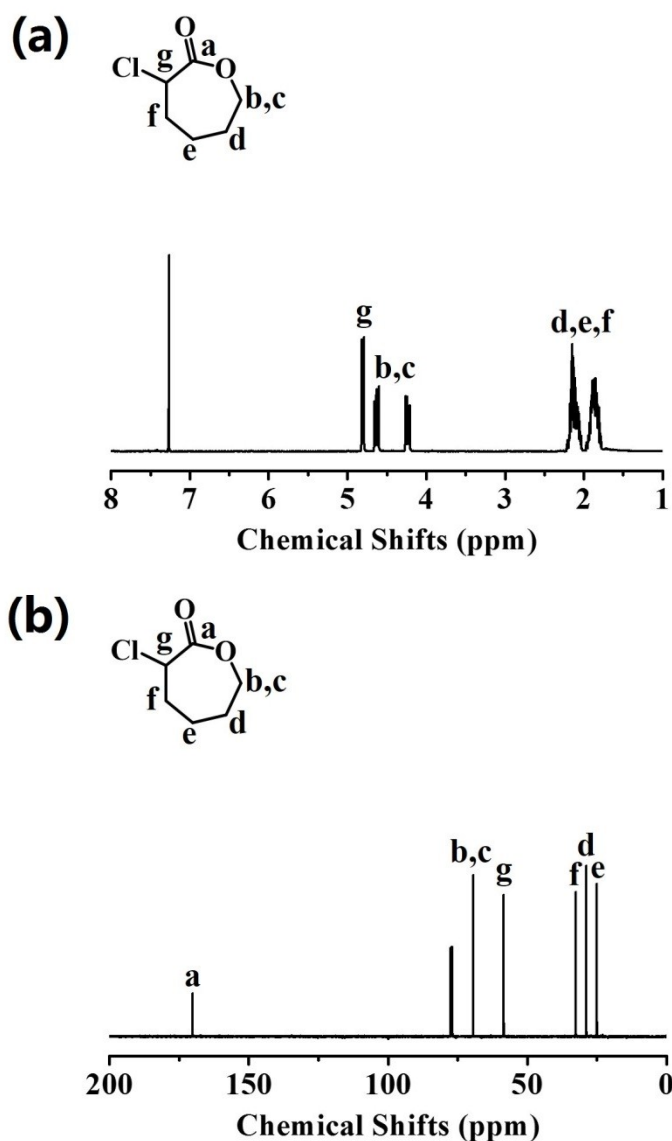

**Figure S1.** (a)  $^1\text{H}$  NMR and (b)  $^{13}\text{C}$  NMR spectrum of  $\alpha\text{Cl-}\epsilon\text{CL}$  monomer.

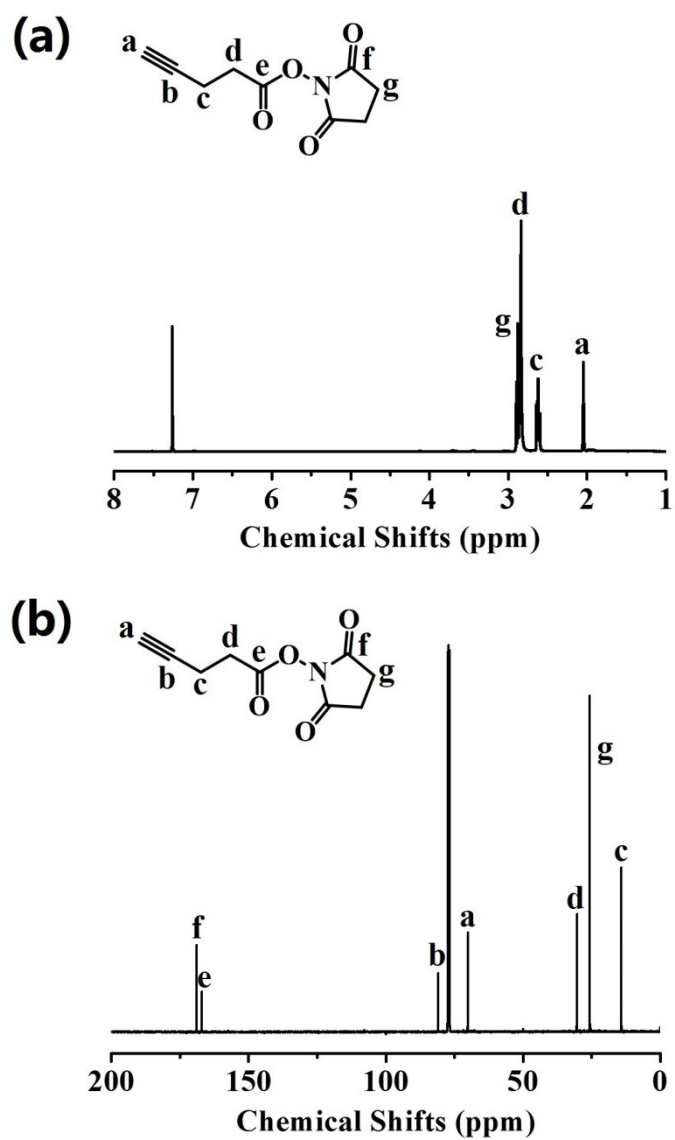

**Figure S2.** (a)  $^1\text{H}$  NMR and (b)  $^{13}\text{C}$  NMR spectrum of pent-4-ynoic acid 1-oxysuccinimidyl ester.

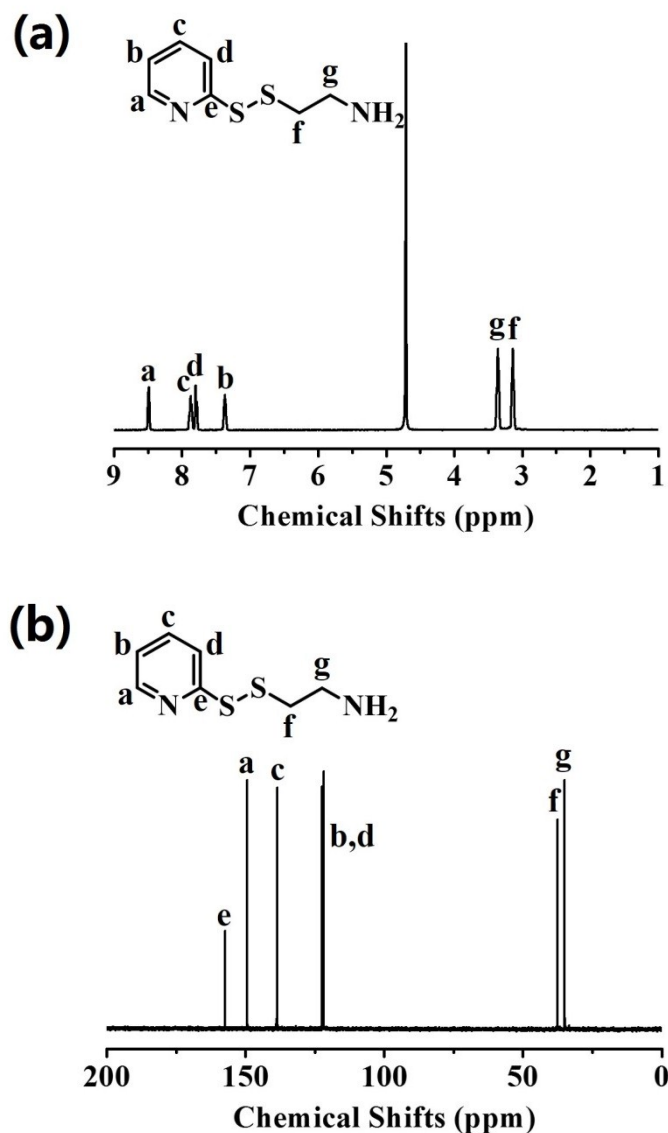

**Figure S3.** (a)  $^1\text{H}$  NMR and (b)  $^{13}\text{C}$  NMR spectrum of pyridine dithioethylamine.

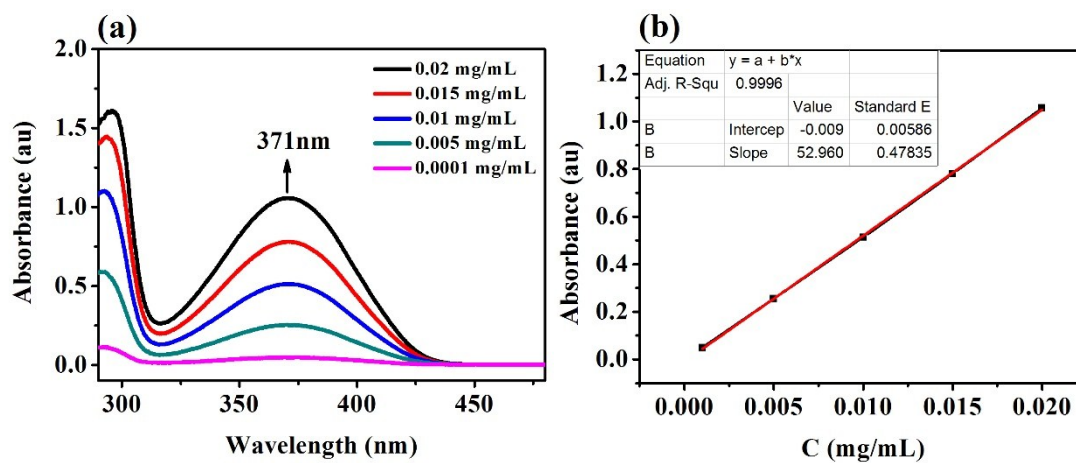

**Figure S4.** (a) UV-vis spectra of pyridine-2-thione in water/DMF mixture (10:1 by

volume) at different concentrations, (b) a standard curve based on UV absorption of pyridine-2-thione at different concentrations.
